# Supplementary material for: Immune checkpoints are predominantly co-expressed by clonally expanded CD4+FoxP3+ intratumoral T-cells in primary human cancers
Source: PubMed Central journal article supplement (PMC10699039; doi:10.1186/s13046-023-02897-6), 2023-12-06
Supplement: 13046_2023_2897_MOESM1_ESM.pdf [file 13046_2023_2897_MOESM1_ESM.pdf]

# Supplementary Data 1

| TARGET | COMPOUND     | Mab type              | COMPANY             | TRIAL       | ORR         | REF                                                     |
|--------|--------------|-----------------------|---------------------|-------------|-------------|---------------------------------------------------------|
| OX40   | INCAGN0194g  | agonistic IgG1K       | Incyte              | NCT02923349 | 1/87 (1,1%) | Davis EJ, et al. J Immunother Cancer. 2022;10:e004235.  |
|        | Ivuxolimab   | agonistic IgG2        | Pfizer              | NCT02315066 | 3/52 (5,8%) | Diab A, et al. Clin Cancer Res. 2022;28:71–83.          |
|        | GSK3174998   | agonistic IgG1        | GSK                 | NCT02528357 | 1/45 (2%)   | Postel-Vinay S, et al. Cancer Res. 2020;80:CT150–CT150. |
|        | MOXR0916     | agonistic IgG1        | Genentech           | NCT02219724 | 2/172 (0%)  | Kim TW, et al. Clin Cancer Res. 2022;28:3452–63.        |
|        | MEDI6469     | murine agonistic IgG1 | Medimmune/AZ        | NCT01644968 | 0/27 (0%)   | Curti BD, et al. Cancer Res. 2013;73:7189–98.           |
|        | BMS-986178   | agonistic IgG1        | BMS                 | NCT02737475 | 0/20 (0%)   | Gutierrez M, et al. Clin Cancer Res. 2021;27:460–72.    |
|        | MEDI0562     | agonistic IgG1K       | Medimmune/AZ        | NCT02318394 | 2/50 (4%)   | Glisson BS, et al. Clin Cancer Res. 2020;26:5358–67.    |
| 4-1BB  | Utomilumab   | agonistic IgG2        | Pfizer              | NCT01307267 | 2/53 (4%)   | Segal NH, et al. Clin Cancer Res. 2018;24:1816–23.      |
|        | Urelumab     | agonistic IgG4        | BMS                 | NCT01775631 | 6/60 (10%)  | Timmerman J, et al. Am J Hematol. 2020;95:510–20.       |
|        | AGEN2373     | agonistic IgG1        | Agenus              | NCT04121676 | 0/19 (0%)   | Tolcher AW, et al. J Clin Oncol. 2021;39:2634.          |
| ICOS   | feladilimab  | agonistic IgG4        | GSK                 | NCT02723955 | 2/13 (8%)   | Balar AV, et al. J Clin Oncol. 2021;39:4519.            |
|        | vopratelimab | agonistic IgG1        | Jounce Therapeutics | NCT02904226 | 1/70 (1,4%) | Yap TA, et al. Clin Cancer Res. 2022;28:3695–708.       |
| TIGIT  | tiragolumab  | antagonistic IgG1K    | Genentech           | NCT02794571 | 0/73 (0%)   | Bendell JC, et al. Cancer Res. 2020;80:CT302–CT302.     |
|        | vibostolimab | antagonistic IgG1K    | MSD                 | NCT02964013 | 0/76 (0%)   | Niu J, et al. Ann Oncol. 2022;33:169–80.                |
