# Supplementary material for: Immune checkpoints are predominantly co-expressed by clonally expanded CD4+FoxP3+ intratumoral T-cells in primary human cancers
Source: PubMed Central journal article supplement (PMC10699039; doi:10.1186/s13046-023-02897-6), 2023-12-06
Supplement: 13046_2023_2897_MOESM3_ESM.pdf [file 13046_2023_2897_MOESM3_ESM.pdf]

# Supplementary Data 3

|                          | MM*               |       | NSCLC |       | RCC# |       | HNSCC |       | EOC  |       | UC   |       | HCC  |       | NET  |    | Thyr |    |      |
|--------------------------|-------------------|-------|-------|-------|------|-------|-------|-------|------|-------|------|-------|------|-------|------|----|------|----|------|
|                          | n                 | %     | n     | %     | n    | %     | n     | %     | n    | %     | n    | %     | n    | %     | n    | %  | n    | %  |      |
| Total                    | 7                 | 9%    | 9     | 12%   | 12   | 16%   | 11    | 14%   | 22   | 29%   | 12   | 16%   | 2    | 3%    | 1    | 1% | 1    | 1% |      |
| Gender                   | Female            | 3     | 43%   | 5     | 56%  | 2     | 17%   | 4     | 36%  | 22    | 100% | 1     | 8%   | 0     | 0%   | 1  | 100% | 1  | 100% |
|                          | Male              | 4     | 57%   | 4     | 44%  | 10    | 83%   | 7     | 64%  | 0     | 0%   | 11    | 92%  | 2     | 100% | 0  | 0%   | 0  | 0%   |
|                          | Missing           | 0     | 0%    | 0     | 0%   | 0     | 0%    | 0     | 0%   | 0     | 0%   | 0     | 0%   | 0     | 0%   | 0  | 0%   | 0  | 0%   |
| Age (years)              | Median            | 48    | -     | 68    | -    | 60    | -     | 63    | -    | 55    | -    | 76    | -    | 75    | -    | 50 | -    | 45 | -    |
|                          | Range             | 39-63 | -     | 63-79 | -    | 33-76 | -     | 21-89 | -    | 19-74 | -    | 47-89 | -    | 71-78 | -    | -  | -    | -  | -    |
|                          | Missing           | 0     | 0%    | 0     | 0%   | 0     | 0%    | 0     | 0%   | 0     | 0%   | 0     | 0%   | 0     | 0%   | 0  | 0%   | 0  | 0%   |
| Metastatic Lymph Nodes   | N+                | 7     | 100%  | 5     | 56%  | 1     | 8%    | 8     | 73%  | 11    | 50%  | 5     | 42%  | 0     | 0%   | 1  | 100% | 0  | 0%   |
|                          | N-                | 0     | 0%    | 4     | 44%  | 11    | 92%   | 2     | 18%  | 5     | 23%  | 5     | 42%  | 0     | 0%   | 0  | 0%   | 1  | 100% |
|                          | Nx                | 0     | 0%    | 0     | 0%   | 0     | 0%    | 1     | 9%   | 6     | 27%  | 0     | 0%   | 2     | 100% | 0  | 0%   | 0  | 0%   |
|                          | Missing           | 0     | 0%    | 0     | 0%   | 0     | 0%    | 0     | 0%   | 0     | 0%   | 2     | 17%  | 0     | 0%   | 0  | 0%   | 0  | 0%   |
| Status at surgery        | Primary           | 0     | 0%    | 8     | 89%  | 6     | 50%   | 11    | 100% | 22    | 100% | 12    | 100% | 0     | 0%   | 1  | 100% | 1  | 100% |
|                          | Relapsing         | 7     | 100%  | 0     | 0%   | 1     | 8%    | 0     | 0%   | 0     | 0%   | 0     | 0%   | 2     | 100% | 0  | 0%   | 0  | 0%   |
|                          | Missing           | 0     | 0%    | 1     | 11%  | 5     | 42%   | 0     | 0%   | 0     | 0%   | 0     | 0%   | 0     | 0%   | 0  | 0%   | 0  | 0%   |
| Prior systemic treatment | Yes               | 1     | 14%   | 1     | 11%  | 2     | 17%   | 2     | 18%  | 10    | 45%  | 1     | 8%   | 1     | 50%  | 0  | 0%   | 0  | 0%   |
|                          | No                | 5     | 71%   | 7     | 78%  | 10    | 83%   | 9     | 82%  | 12    | 55%  | 9     | 75%  | 1     | 50%  | 1  | 100% | 1  | 100% |
|                          | Missing           | 1     | 14%   | 1     | 11%  | 0     | 0%    | 0     | 0%   | 0     | 0%   | 2     | 17%  | 0     | 0%   | 0  | 0%   | 0  | 0%   |
| NLR                      | <4                | 0     | 0%    | 3     | 33%  | 3     | 25%   | 9     | 82%  | 15    | 68%  | 0     | 0%   | 1     | 50%  | 1  | 100% | 0  | 0%   |
|                          | ≥4                | 0     | 0%    | 5     | 56%  | 5     | 42%   | 1     | 9%   | 5     | 23%  | 0     | 0%   | 0     | 0%   | 0  | 0%   | 0  | 0%   |
|                          | Missing           | 7     | 100%  | 1     | 11%  | 4     | 33%   | 1     | 9%   | 2     | 9%   | 12    | 100% | 1     | 50%  | 0  | 0%   | 1  | 100% |
| dNLR                     | <3                | 0     | 0%    | 6     | 67%  | 4     | 33%   | 9     | 82%  | 17    | 77%  | 0     | 0%   | 1     | 50%  | 1  | 100% | 0  | 0%   |
|                          | ≥3                | 0     | 0%    | 2     | 22%  | 4     | 33%   | 1     | 9%   | 3     | 14%  | 0     | 0%   | 0     | 0%   | 0  | 0%   | 0  | 0%   |
|                          | Missing           | 7     | 100%  | 1     | 11%  | 4     | 33%   | 1     | 9%   | 2     | 9%   | 12    | 100% | 1     | 100% | 0  | 0%   | 1  | 100% |
| Assays                   | Cytometry T cells | 7     | 100%  | 7     | 78%  | 12    | 100%  | 10    | 91%  | 21    | 95%  | 12    | 100% | 1     | 50%  | 1  | 100% | 1  | 100% |
|                          | CytometryICPs     | 7     | 100%  | 6     | 67%  | 7     | 58%   | 8     | 73%  | 4     | 18%  | 0     | 0%   | 1     | 50%  | 1  | 100% | 1  | 100% |
|                          | scRNAseq          | 0     | 0%    | 2     | 22%  | 0     | 0%    | 1     | 9%   | 1     | 5%   | 0     | 0%   | 1     | 50%  | 0  | 0%   | 0  | 0%   |

MM: Metastatic Melanoma; NSCLC: Non-Small Cell Lung Cancer; RCC: Renal Cell Carcinoma; HNSCC: Head and Neck Squamous Cell Carcinoma; EOC: Epithelial Ovarian Cancer; UC: Urothelial Carcinoma; HCC Hepatocellular Carcinoma; NET: Neuroendocrine Tumor; Thyr: thyroid cancer; NLR: Neutrophil-to-Lymphocyte Ratio; dNLR: derived Neutrophil-to-Lymphocyte Ratio; \* all samples analyzed were metastatic lymph nodes; # 1/12 samples was a metastatic lymph node.
