# Supplementary material for: Immune checkpoints are predominantly co-expressed by clonally expanded CD4+FoxP3+ intratumoral T-cells in primary human cancers
Source: PubMed Central journal article supplement (PMC10699039; doi:10.1186/s13046-023-02897-6), 2023-12-06

# Supplementary Data 6

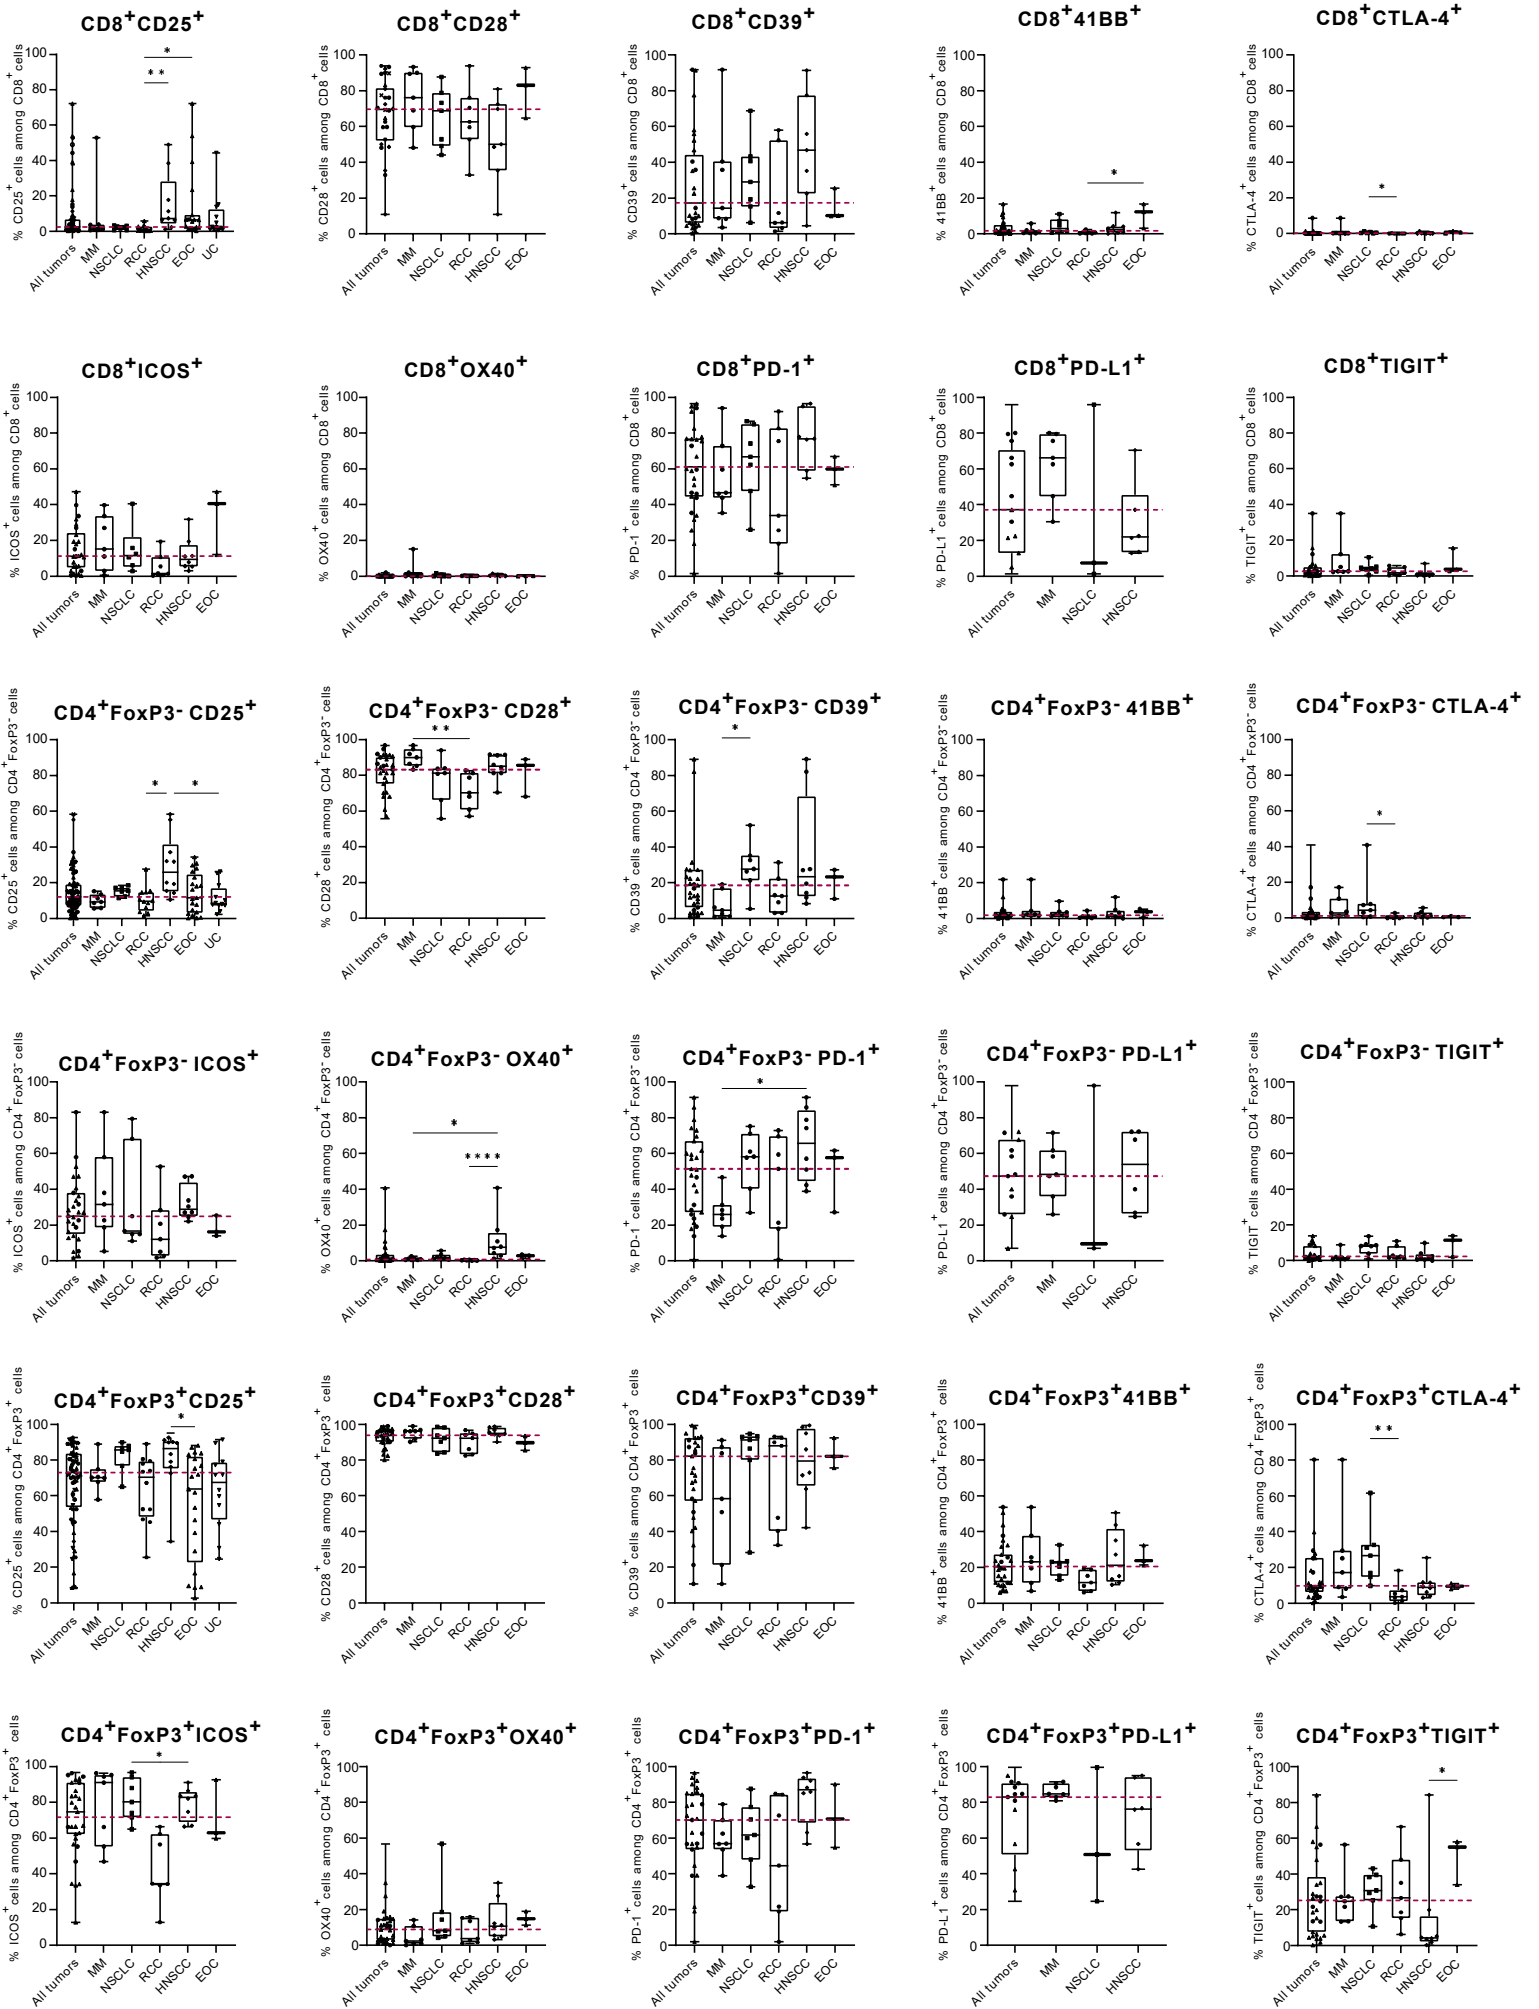

Supplement: 13046_2023_2897_MOESM6_ESM.pdf [file 13046_2023_2897_MOESM6_ESM.pdf]
