# Supplementary material for: Immune checkpoints are predominantly co-expressed by clonally expanded CD4+FoxP3+ intratumoral T-cells in primary human cancers
Source: PubMed Central journal article supplement (PMC10699039; doi:10.1186/s13046-023-02897-6), 2023-12-06
Supplement: 13046_2023_2897_MOESM10_ESM.pdf [file 13046_2023_2897_MOESM10_ESM.pdf]

# Supplementary Data 10

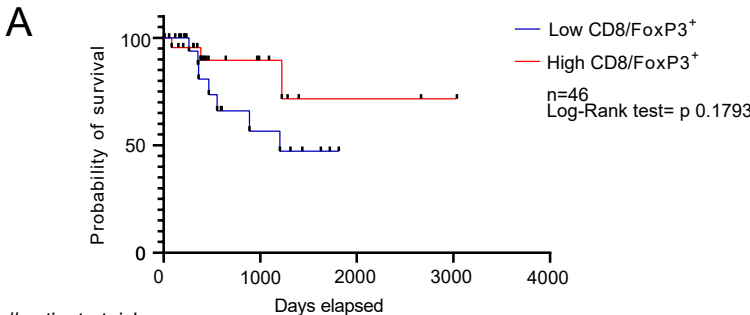

# patient at risk

|                             |    |   |   |   |   |
|-----------------------------|----|---|---|---|---|
| Low CD8/FoxP3 <sup>+</sup>  | 23 | 7 | 1 | 1 | 0 |
| High CD8/FoxP3 <sup>+</sup> | 23 | 7 | 3 | 2 | 0 |

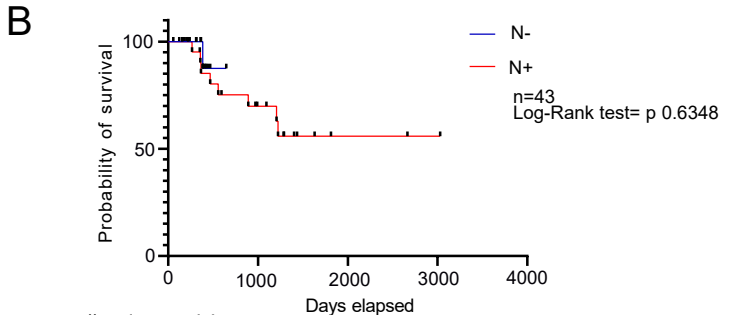

# patient at risk

|    |    |    |   |   |   |
|----|----|----|---|---|---|
| N- | 14 | 0  | 0 | 0 | 0 |
| N+ | 29 | 12 | 3 | 2 | 0 |

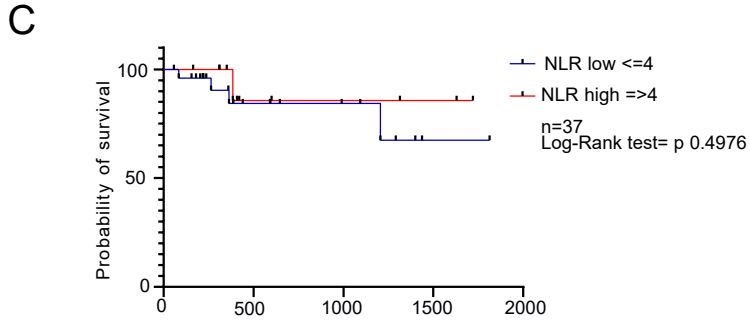

# patient at risk

|          |    |    |   |   |   |
|----------|----|----|---|---|---|
| NLR low  | 26 | 11 | 7 | 2 | 0 |
| NLR high | 11 | 5  | 4 | 3 | 0 |

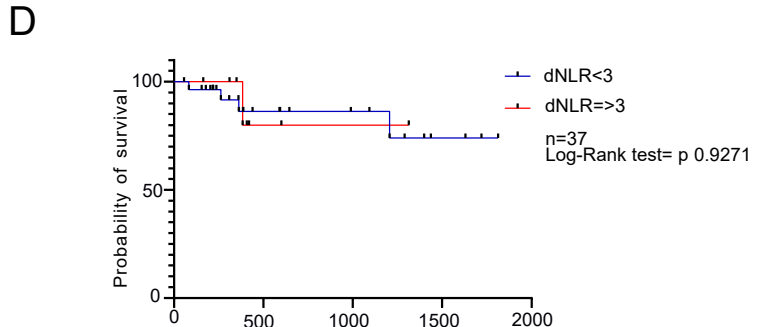

# patient at risk

|           |    |    |   |   |   |
|-----------|----|----|---|---|---|
| dNLR low  | 29 | 13 | 9 | 4 | 0 |
| dNLR high | 8  | 3  | 2 | 1 | 0 |
