# Supplementary material for: Immune checkpoints are predominantly co-expressed by clonally expanded CD4+FoxP3+ intratumoral T-cells in primary human cancers
Source: J Exp Clin Cancer Res. 2023 Dec 6;42:333. doi: 10.1186/s13046-023-02897-6 (PMC10699039; doi:10.1186/s13046-023-02897-6)
Supplement: Supplementary file 11 — Additional file 11: Supplementary Data 11. Assignment of single-cell clusters to T-cell lineages according to the expression of canonical gene markers. [file 13046_2023_2897_MOESM11_ESM.pdf]

## Supplementary Data 11

[illegible]
